# Supplementary material for: Experimental methodology used for testing in vivo adhesion of composite meshes for incisional hernia repair: a scoping review
Source: Royal Society of Chemistry journal article supplement (doi:10.1039/d5ra02062j), 2025-01-01
Supplement: d5ra02062j2.pdf [file d5ra02062j2.pdf]

Appendix IV Description of the components of composite meshes

| Adhesion barrier layer/coating     |                                                                                  | Mesh layer                                           | Product name/ non-marketed          |
|------------------------------------|----------------------------------------------------------------------------------|------------------------------------------------------|-------------------------------------|
| Type of material                   | Chemical name of material                                                        |                                                      |                                     |
| Non-absorbable synthetic materials | Expanded polytetrafluoroethylene (ePTFE)                                         | Polypropylene                                        | Intramesh T1                        |
|                                    | Expanded polytetrafluoroethylene (ePTFE)                                         | Polypropylene                                        | Composix®                           |
|                                    | Titanium coating (plasma activated chemical vapor deposition of atomic Titanium) | Polypropylene                                        | TiMesh®                             |
|                                    | Polyvinylidene fluoride (PVDF)                                                   | Polypropylene                                        | Dynamesh®-IPoM                      |
|                                    | Aliphatic poly(etherurethane)                                                    | Non-woven polyester/polyethylene terephthalate       | Hi-Tex Endo-IP®                     |
|                                    | Poly[poly (ethylene glycol) methacrylate-co-dopamine methacrylamide              | O <sub>2</sub> -plasma-treated Polypropylene         | Non-marketed                        |
|                                    | N-vinyl pyrrolidone and n-butyl methacrylate                                     | Polypropylene                                        | Non-marketed                        |
|                                    | Polyurethane                                                                     | Polypropylene                                        | Combi Mesh                          |
| Absorbable synthetic materials     | Poly (glycolide-co-caprolactone)                                                 | Polypropylene                                        | PHYSIOMESH® Flexible Composite Mesh |
|                                    | Poly (lactide-co-caprolactone)                                                   | Polypropylene                                        | Non-marketed                        |
|                                    | Poly (lactide-co-glycolide)                                                      | Polypropylene                                        | Non-marketed                        |
|                                    | Polycaprolactone                                                                 | Polypropylene                                        | Non-marketed                        |
| Natural materials                  | Sodium hyaluronate-carboxymethylcellulose                                        | Polypropylene                                        | Sepramesh®                          |
|                                    | Sodium hyaluronate-carboxymethylcellulose-polyethylene glycol                    | Co-knitted using polypropylene and polyglycolic acid | Ventralight®                        |
|                                    | Sodium carboxymethylcellulose                                                    | Polypropylene                                        | Non-marketed                        |
|                                    | Oxidized carboxymethylcellulose-g-dopamine blended with carboxymethyl chitosan   | Polypropylene                                        | Non-marketed                        |
|                                    | Omega-3 fatty acids                                                              | Polypropylene                                        | C-Qur®                              |
|                                    | Collagen                                                                         | Polyester                                            | SYMBOTEX® Composite Mesh            |
|                                    | Collagen                                                                         | Polyethylene terephthalate                           | Non-marketed                        |
|                                    | Collagen                                                                         | Polypropylene                                        | Non-marketed                        |
|                                    |                                                                                  |                                                      |                                     |

|                    |                                                                                                              |                                                  |              |
|--------------------|--------------------------------------------------------------------------------------------------------------|--------------------------------------------------|--------------|
| Composite material | Collagen-glycosaminoglycan                                                                                   | Polypropylene                                    | Non-marketed |
|                    | Chitosan                                                                                                     | Polypropylene                                    | Non-marketed |
|                    | Cellulose                                                                                                    | Co-knitted using Polypropylene and polydioxanone | Non-marketed |
|                    | Oxidized regenerated cellulose                                                                               | Polypropylene                                    | Proceed®     |
|                    | Oxidized collagen and chitosan                                                                               | Polyester                                        | Non-marketed |
|                    | Regenerated silk fibroin                                                                                     | Polypropylene                                    | Non-marketed |
|                    | 2% agarose hydrogel                                                                                          | Polypropylene                                    | Non-marketed |
|                    | 2% agarose hydrogel-10 ug sirolimus                                                                          | Polypropylene                                    | Non-marketed |
|                    | Small intestinal submucosa                                                                                   | polypropylene                                    | Zenapro™     |
|                    | Human amniotic membrane                                                                                      | Polypropylene                                    | Non-marketed |
|                    | Processed human peritoneal membrane                                                                          | Expanded polytetrafluoroethylene (ePTFE)         | Non-marketed |
|                    | Processed human fascia lata                                                                                  | Expanded polytetrafluoroethylene (ePTFE)         | Non-marketed |
|                    | Auto-cross-linked polymers (ACP) Gel (Hyalobarrier® gel, Fidia Advanced Biopolymers srl, Abano Terme, Italy) | Polypropylene                                    | Non-marketed |
|                    | Fibrinogen glue (FG) (Tissucol®, Baxter Healthcare Corporation, Deerfield, USA)                              | Polypropylene                                    | Non-marketed |
|                    | Fibrinogen glue (FG) (Tissucol®, Baxter Healthcare Corporation, Deerfield, USA)                              | Expanded polytetrafluoroethylene (ePTFE)         | Non-marketed |
|                    | 4DryField® PH premixed gel 19                                                                                | Polypropylene                                    | Non-marketed |
|                    | 4DryField® PH in-situ mixed gel                                                                              | Polypropylene                                    | Non-marketed |
|                    | Collagen–polyethylene glycol–glycerol                                                                        | Polyester                                        | Parietex®    |
|                    | Collagen–polyethylene glycol–glycerol                                                                        | Polypropylene                                    | Parietene®   |
|                    | Polyethylene glycol-glycerol                                                                                 | Polyester                                        | Non-marketed |
|                    | Bovine amniotic membrane + 5% polyethylene glycol                                                            | Polypropylene                                    | Non-marketed |
|                    | Bovine amniotic membrane + 5 ml of 0.9% NaCl                                                                 | Polypropylene                                    | Non-marketed |
|                    | Collagen-poly (lactide-co-caprolactone)                                                                      | Polypropylene                                    | Non-marketed |

Hyaluronate -poly (lactide-co-caprolactone)

Polypropylene

Non-marketed

---
