# Supplementary material for: Experimental methodology used for testing in vivo adhesion of composite meshes for incisional hernia repair: a scoping review
Source: Royal Society of Chemistry journal article supplement (doi:10.1039/d5ra02062j), 2025-01-01
Supplement: d5ra02062j4.pdf [file d5ra02062j4.pdf]

**Appendix VI Rating system with combination indicators for adhesion assessment**

| Indicators                   | Score | Scoring system                                                                                                                                                                                                                                                                                                                                                                                                                                                                                                                                                                                                                                        |
|------------------------------|-------|-------------------------------------------------------------------------------------------------------------------------------------------------------------------------------------------------------------------------------------------------------------------------------------------------------------------------------------------------------------------------------------------------------------------------------------------------------------------------------------------------------------------------------------------------------------------------------------------------------------------------------------------------------|
| Scope & Appearance           | 0-4   | <b>0</b> No adhesion; <b>1</b> Thin or narrow, easily separable adhesions; <b>2</b> Adhesions limited to a small area; <b>3</b> Thick adhesions dispersed over a large area; <b>4</b> Thick and wide adhesions, adhesions of the organs to the anterior and/or posterior abdominal wall                                                                                                                                                                                                                                                                                                                                                               |
| Area & Strength & Appearance | 0-4   | Score    Area    Adhesion grading by resistance to lysis<br>0    None    No significant adhesions<br>1    ≤ 25%    Thin, narrow, and easily detachable adhesions<br>2    ≥ 25%, and ≤ 50%    Thick adhesions limited to one area<br>3    ≥ 50%    Thick and broad adhesions<br>4    --    Thick and broad adhesions, involving the anterior or posterior abdominal wall, and the viscera                                                                                                                                                                                                                                                              |
| Strength & Appearance        | 1-4   | <b>1</b> adhesion include fibrin deposits, fine thread-like adhesion strands, or slight organ adhesions that can be lysed with blunt instruments; <b>2</b> also includes adhesion strands that can be lysed with blunt instruments, but partly also ones that are only lysable with sharp instruments, with incipient fragile vascularization; <b>3</b> adhesions include clearly vascularized, strong adhesion strands which are only lysable with sharp instruments; <b>4</b> adhesions are firm, extensive organ adhesions, which are only lysable with sharp instruments and for which surgical treatment for organ damage is almost unavoidable. |
| Strength & Appearance        | 1-4   | <b>1</b> Filmly adhesion, easy to separate by blunt dissection; <b>2</b> Stronger adhesion with blunt dissection possible, but partly sharp dissection necessary and with beginning of vascularization; <b>3</b> Strong adhesion with lysis possible only by sharp dissection and clear vascularization; <b>4</b> Very strong adhesion with lysis possible only by sharp dissection and with organs strongly attached so that their damage is hardly preventable                                                                                                                                                                                      |
| Strength & Appearance        | 1-4   | <b>1</b> Filmly adhesion which can be easily separated by blunt dissection; <b>2</b> Hard adhesion which can be separated by blunt dissection and partial sharp dissection at the start of vascularization; <b>3</b> Strong vascularized adhesion which can be separated by only sharp dissection; <b>4</b> Very strong adhesion which can be separated only by sharp dissection causing damage on organs.                                                                                                                                                                                                                                            |
| Appearance & Scope           | 1-4   | <b>1</b> Filmly, avascular or no adhesion; <b>2</b> Bowel adhesion; <b>3</b> One adhesion region of liver or spleen with or without bowel; <b>4</b> More than two adhesion regions of liver or spleen with or without bowel                                                                                                                                                                                                                                                                                                                                                                                                                           |
| Strength & Appearance        | 1-2   | A score of <b>1</b> was given to a closure technique that had either no associated adhesions or mild adhesions (viscus could be freed by gentle blunt dissection); A score of <b>2</b> was given to a closure technique that had moderate adhesions (viscus could be freed by aggressive blunt dissection) or severe adhesions (adhesions requiring sharp dissection for release and/or the presence of abscesses)                                                                                                                                                                                                                                    |
| Strength &                   | 0-5   | <b>0</b> no adhesions observed; <b>1</b> loose adhesion requiring blunt dissection only; <b>2</b> firm adhesion requiring sharp dissection without extensive vascularity; <b>3</b> firm adhesion                                                                                                                                                                                                                                                                                                                                                                                                                                                      |

|                              |      |                 |                                                                                                                                                                                                                                                                                                                                                                                                                                                                                                                                                                                                                                                                                                                                                                                                             |                                |                                     |                |             |
|------------------------------|------|-----------------|-------------------------------------------------------------------------------------------------------------------------------------------------------------------------------------------------------------------------------------------------------------------------------------------------------------------------------------------------------------------------------------------------------------------------------------------------------------------------------------------------------------------------------------------------------------------------------------------------------------------------------------------------------------------------------------------------------------------------------------------------------------------------------------------------------------|--------------------------------|-------------------------------------|----------------|-------------|
| Appearance & Scope           |      |                 | requiring sharp dissection with extensive vascularity; <b>4</b> firm adhesion requiring sharp dissection with extensive fibrotic ingrowth and extensive vascularity; <b>5</b> grade 4 with a firm attachment to visceral organs (bowel, liver, spleen).                                                                                                                                                                                                                                                                                                                                                                                                                                                                                                                                                     |                                |                                     |                |             |
| Strength & Area & Scope      | 0-12 |                 | <b>1</b> Adhesion scope: only involving the omentum, 1 point; another involving the small intestine, 2 points; another involving the liver, spleen, and other areas, 1 point, 3 points; another involving the liver, spleen, and other areas, 2 or more points, 4 points. <b>2</b> adhesion strength: loose adhesions, easy to separate, no bleeding, 1 point; adhesions slightly dense, need to pull after separation, separation surface with bleeding, 2 points; adhesions dense, need more force to pull after separation, 3 points; adhesions dense, after more force to pull still can not be separated, 4 points. <b>3</b> Adhesive area: less than 25% of the mesh area, 1 point; 25% ~ 50%, 2 points; 50% ~ 75%, 3 points; > 75%, 4 points. The total score is 12 points, no adhesion is 0 points. |                                |                                     |                |             |
| Area & Appearance            | 0-12 | Parameter       | Score                                                                                                                                                                                                                                                                                                                                                                                                                                                                                                                                                                                                                                                                                                                                                                                                       |                                |                                     |                |             |
|                              |      | 0               | 1                                                                                                                                                                                                                                                                                                                                                                                                                                                                                                                                                                                                                                                                                                                                                                                                           | 2                              | 3                                   | 4              |             |
|                              |      | Adhesion        |                                                                                                                                                                                                                                                                                                                                                                                                                                                                                                                                                                                                                                                                                                                                                                                                             |                                |                                     |                |             |
|                              |      | area (%)        | No adhesions                                                                                                                                                                                                                                                                                                                                                                                                                                                                                                                                                                                                                                                                                                                                                                                                | 1-25% de mesh                  | 26-50% de mesh                      | 51-75% de mesh | 76-100%mesh |
|                              |      |                 | covered by adhesion covered by adhesion covered by adhesion covered by adhesion                                                                                                                                                                                                                                                                                                                                                                                                                                                                                                                                                                                                                                                                                                                             |                                |                                     |                |             |
|                              |      | Adhesion        |                                                                                                                                                                                                                                                                                                                                                                                                                                                                                                                                                                                                                                                                                                                                                                                                             |                                |                                     |                |             |
|                              |      | vascularization | No                                                                                                                                                                                                                                                                                                                                                                                                                                                                                                                                                                                                                                                                                                                                                                                                          | yes                            | -                                   | -              | -           |
|                              |      | Adhesion size   | No                                                                                                                                                                                                                                                                                                                                                                                                                                                                                                                                                                                                                                                                                                                                                                                                          | < 5 mm                         | 5-10 mm                             | 11-15 mm       | > 15 mm     |
| Area & Strength & Appearance | 0-12 | Score           | Extent (%)                                                                                                                                                                                                                                                                                                                                                                                                                                                                                                                                                                                                                                                                                                                                                                                                  | Tenacity                       | Type                                |                |             |
|                              |      | 0, 0            | None                                                                                                                                                                                                                                                                                                                                                                                                                                                                                                                                                                                                                                                                                                                                                                                                        | None                           |                                     |                |             |
|                              |      | 1, < 25         | Easily lysed                                                                                                                                                                                                                                                                                                                                                                                                                                                                                                                                                                                                                                                                                                                                                                                                |                                | Filmy, no vessels                   |                |             |
|                              |      | 2, 25-50        | Lysed with traction                                                                                                                                                                                                                                                                                                                                                                                                                                                                                                                                                                                                                                                                                                                                                                                         |                                | Opaque, no vessels                  |                |             |
|                              |      | 3, 50-75        | Required sharp dissection                                                                                                                                                                                                                                                                                                                                                                                                                                                                                                                                                                                                                                                                                                                                                                                   |                                | Opaque, small vessels               |                |             |
|                              |      | 4, > 75         |                                                                                                                                                                                                                                                                                                                                                                                                                                                                                                                                                                                                                                                                                                                                                                                                             |                                | Opaque, large vessels               |                |             |
| Area & Appearance & strength | 0-12 | Adhesion score  | Adhesion area                                                                                                                                                                                                                                                                                                                                                                                                                                                                                                                                                                                                                                                                                                                                                                                               | Adhesion type                  | Tenacity                            |                |             |
|                              |      | 0               | None                                                                                                                                                                                                                                                                                                                                                                                                                                                                                                                                                                                                                                                                                                                                                                                                        | None                           | None                                |                |             |
|                              |      | 1               | <25%                                                                                                                                                                                                                                                                                                                                                                                                                                                                                                                                                                                                                                                                                                                                                                                                        | Filmy, transparent, avascular  | Adhesion falls apart                |                |             |
|                              |      | 2               | <50%                                                                                                                                                                                                                                                                                                                                                                                                                                                                                                                                                                                                                                                                                                                                                                                                        | Opaque, translucent, avascular | Adhesion lysed with traction        |                |             |
|                              |      | 3               | <75%                                                                                                                                                                                                                                                                                                                                                                                                                                                                                                                                                                                                                                                                                                                                                                                                        | Opaque, capillaries present    | Adhesion requiring sharp dissection |                |             |

|                                                                                                                                                                                                       |      |                                                                                                                                                                                                                                                                                                                                                                                                                                                                                                                                                                                                                                                                                                                                            |                                  |                    |                                    |  |  |   |
|-------------------------------------------------------------------------------------------------------------------------------------------------------------------------------------------------------|------|--------------------------------------------------------------------------------------------------------------------------------------------------------------------------------------------------------------------------------------------------------------------------------------------------------------------------------------------------------------------------------------------------------------------------------------------------------------------------------------------------------------------------------------------------------------------------------------------------------------------------------------------------------------------------------------------------------------------------------------------|----------------------------------|--------------------|------------------------------------|--|--|---|
|                                                                                                                                                                                                       |      |                                                                                                                                                                                                                                                                                                                                                                                                                                                                                                                                                                                                                                                                                                                                            | 4                                | <100%              | Opaque, larger vessels present     |  |  | / |
| Appearance & strength                                                                                                                                                                                 | 1-12 | Score                                                                                                                                                                                                                                                                                                                                                                                                                                                                                                                                                                                                                                                                                                                                      | 1                                | 2                  | 3                                  |  |  |   |
|                                                                                                                                                                                                       |      | Width of adhesions in mm                                                                                                                                                                                                                                                                                                                                                                                                                                                                                                                                                                                                                                                                                                                   | <2                               | 2–10               | >10                                |  |  |   |
|                                                                                                                                                                                                       |      | Thickness in mm                                                                                                                                                                                                                                                                                                                                                                                                                                                                                                                                                                                                                                                                                                                            | <1                               | 1–3                | >3                                 |  |  |   |
|                                                                                                                                                                                                       |      | Subjective strength                                                                                                                                                                                                                                                                                                                                                                                                                                                                                                                                                                                                                                                                                                                        | +                                | ++                 | +++                                |  |  |   |
|                                                                                                                                                                                                       |      | Amount of visible strands                                                                                                                                                                                                                                                                                                                                                                                                                                                                                                                                                                                                                                                                                                                  | 0–2                              | 3–4                | >4                                 |  |  |   |
| A total of 1–4 points is regarded as a mild grade of adhesion, 5–8 points as moderate, and 9–12 points as severe.                                                                                     |      |                                                                                                                                                                                                                                                                                                                                                                                                                                                                                                                                                                                                                                                                                                                                            |                                  |                    |                                    |  |  |   |
| Area & Appearance & strength                                                                                                                                                                          | 0-11 | The total adhesion score (range, 0–11) based on the extent (0 = no adhesions,1 = 1–25 % involvement of the mesh surface,2 = 26–50 % involvement, 3 = 51–75 % involvement, 4 = 76–100 % involvement), type (0 = no adhesions,1 = Filmy, transparent, avascular, 2 = Opaque, translucent, avascular, 3 = Opaque, capillaries present, 4 = Opaque, large vessels present), and tenacity of adhesions (0 = no adhesions,1 = adhesions fall apart easily, 2 = traction required, 3 = sharp dissection required                                                                                                                                                                                                                                  |                                  |                    |                                    |  |  |   |
| Area & Appearance & strength                                                                                                                                                                          | 0-11 | The total adhesion score (range, 0–11) based on the extent (0 = no adhesions,1 = 1–25 % involvement of the mesh surface,2 = 26–50 % involvement, 3 = 51–75 % involvement, 4 = 76–100 % involvement), type (0 = no adhesions,1 =filmy, 2 = dense, 3 = capillaries present, 4 = larger vessels), and tenacity of adhesions (0 = no adhesions,1 = adhesions fall apart easily, 2 = traction required, 3 = sharp dissection required)                                                                                                                                                                                                                                                                                                          |                                  |                    |                                    |  |  |   |
| Area & Appearance & strength                                                                                                                                                                          | 1-10 | The Hoffmann scoring scheme covers three different aspects: 1) the area of adhesion formation, graded 0 to 4 (0; no adhesions, 1; cecum to bowl adhesion, 2; cecum to sidewall adhesion over less than 25% of the abraded surface area, 3; cecum to sidewall adhesion between 25% and 50% of the abraded surface area, 4; cecum to sidewall adhesion over 50% of the abraded surface area); 2) the strength, graded 0 to 3 (0; no adhesion, 1; gentle traction required to break adhesion, 2; traction required to break adhesion); 3) the extent, also graded 0 to 3 (0; no adhesion, 1; filmy adhesion, 2; vascularized adhesion,3; opaque or cohesive adhesion). These three subscores were summed for a total Hoffmann adhesion score. |                                  |                    |                                    |  |  |   |
| Area & Appearance & strength                                                                                                                                                                          | 0-9  | Score                                                                                                                                                                                                                                                                                                                                                                                                                                                                                                                                                                                                                                                                                                                                      | Extent                           | Quality            | Required dissection                |  |  |   |
|                                                                                                                                                                                                       |      | 0                                                                                                                                                                                                                                                                                                                                                                                                                                                                                                                                                                                                                                                                                                                                          | No adhesions                     | No adhesions       | No adhesions                       |  |  |   |
|                                                                                                                                                                                                       |      | 1                                                                                                                                                                                                                                                                                                                                                                                                                                                                                                                                                                                                                                                                                                                                          | <25 % involvement of the surface | Filmy              | Adhesions fall apart easily        |  |  |   |
|                                                                                                                                                                                                       |      | 2                                                                                                                                                                                                                                                                                                                                                                                                                                                                                                                                                                                                                                                                                                                                          | 26–50 % involvement              | Vascularized/dense | Traction required/blunt dissection |  |  |   |
|                                                                                                                                                                                                       |      | 3                                                                                                                                                                                                                                                                                                                                                                                                                                                                                                                                                                                                                                                                                                                                          | >50 % involvement                | Fibrotic           | Sharp dissection required          |  |  |   |
| The Total Adhesion Score (TAS), ranging from 0 to 9 and acquired by adding relative scores from extent (0–3), quality (0 3), and required dissection (0–3) of adhesions was calculated for each mesh. |      |                                                                                                                                                                                                                                                                                                                                                                                                                                                                                                                                                                                                                                                                                                                                            |                                  |                    |                                    |  |  |   |
| Strength &                                                                                                                                                                                            | 1-64 | Adhesion                                                                                                                                                                                                                                                                                                                                                                                                                                                                                                                                                                                                                                                                                                                                   | Area 0≤1/3                       | Area 1/3≤2/3       | Area 2/3–3/3                       |  |  |   |

|            |   |    |                                                                                                                                                         |    |    |    |  |
|------------|---|----|---------------------------------------------------------------------------------------------------------------------------------------------------------|----|----|----|--|
| Area       |   |    | Type 1, filmy                                                                                                                                           | 1  | 2  | 4  |  |
|            |   |    | Type 2, easily separable                                                                                                                                | 4  | 8  | 16 |  |
|            |   |    | Type 3, requiring sharp dissection                                                                                                                      | 16 | 32 | 64 |  |
| Strength   | & | No | a) loose, transparent, and easily dissected;                                                                                                            |    |    |    |  |
| Appearance |   |    | b) firm, whitish in color, and more difficult to dissect;                                                                                               |    |    |    |  |
|            |   |    | c) integrated within the prosthesis/visceral peritoneum interface and difficult to dissect away from the biomaterial and intestinal serosa              |    |    |    |  |
| Strength   | & | No | loose (transparent, poorly vascularized filmy adhesions that were easily dissected);                                                                    |    |    |    |  |
| Appearance |   |    | firm (denser adhesions, whitish in color and difficult to dissect);                                                                                     |    |    |    |  |
|            |   |    | integrated (requiring sharp dissection to pull away from the mesh, occasionally producing serosal damage to the organ involved).                        |    |    |    |  |
| Appearance | & | No | Adhesion characteristics, including the location, shape (band or string), anatomical structures involved, and appearance of the mesh surface was noted. |    |    |    |  |
| Scope      |   |    |                                                                                                                                                         |    |    |    |  |

---
