# Supplementary material for: Experimental methodology used for testing in vivo adhesion of composite meshes for incisional hernia repair: a scoping review
Source: Royal Society of Chemistry journal article supplement (doi:10.1039/d5ra02062j), 2025-01-01
Supplement: d5ra02062j5.pdf [file d5ra02062j5.pdf]

#### Appendix V Rating system with the single indicator for adhesion assessment

| Indicator | Score | Scoring system                                                                                                                                                                                                                                                                                                                                                                                                                                                                                 |
|-----------|-------|------------------------------------------------------------------------------------------------------------------------------------------------------------------------------------------------------------------------------------------------------------------------------------------------------------------------------------------------------------------------------------------------------------------------------------------------------------------------------------------------|
| Area      | 0-4   | <b>0</b> No adhesions; <b>1</b> $\leq 25$ % surface of mesh involvement; <b>2</b> $\leq 50$ % surface of mesh involvement; <b>3</b> $\leq 75$ % surface of mesh involvement; <b>4</b> $> 75$ % surface of mesh involvement                                                                                                                                                                                                                                                                     |
|           | 0-3   | <b>0</b> No adhesions; <b>1</b> Adhesion covering less than 25% of the surface of mesh; <b>2</b> Adhesions covering between 25% and 50% of the surface of the mesh; <b>3</b> Mesh covered by adhesions in more than 50% of the surface                                                                                                                                                                                                                                                         |
|           | 1-4   | <b>1</b> $< 25\%$ surface of mesh involvement; <b>2</b> 25%-50% surface of mesh involvement ; <b>3</b> 51%-75% surface of mesh involvement; <b>4</b> $> 75\%$ surface of mesh involvement                                                                                                                                                                                                                                                                                                      |
|           | 1-2   | <b>1</b> The absence of adhesions or repairs in which the adhesions covered less than half of the defect; <b>2</b> The adhesions involved at least one-half the repair's surface area.                                                                                                                                                                                                                                                                                                         |
| Scope     | 0-4   | <b>0</b> Complete absence of adhesions; <b>1</b> Single band of adhesions, between viscera, or from one viscus to abdominal wall; <b>2</b> Two bands, either between viscera or from viscera to abdominal wall; <b>3</b> More than two bands, between viscera, or viscera to the abdominal wall, or whole of intestines forming a mass without being adherent to abdominal wall; <b>4</b> Viscera directly adherent to the abdominal wall, irrespective of number and extent of adhesive bands |
|           | 0-4   | <b>0</b> No adherence; <b>1</b> Single adherence between two organs or between an organ and the abdominal wall; <b>2</b> Two adherences between organs or one organ and the abdominal wall; <b>3</b> More than two adherences between the organs or a massive generalized adherence of the intestine with no adherence to the abdominal wall.; <b>4</b> Generalized adherences between organs and the abdominal wall or massive adherence among all organs                                     |
|           | 0-5   | <b>0</b> No adhesion; <b>1</b> slight omental adhesion on suture lines; <b>2</b> omental adhesion by less than 50%; <b>3</b> omental adhesion by more than 50%; <b>4</b> visceral adhesion on suture lines; <b>5</b> visceral adhesion on mesh                                                                                                                                                                                                                                                 |
|           | No    | The structures that were adherent to the mesh were recorded. These included the omentum, small intestine, large intestine, stomach, and liver.                                                                                                                                                                                                                                                                                                                                                 |
| Strength  | 0-4   | <b>0</b> No resistance to separation; <b>1</b> Mild (filmy), easily separated; <b>2</b> Moderate resistance to separation; <b>3</b> Marked resistance to separation; <b>4</b> Sharp dissection required for separation                                                                                                                                                                                                                                                                         |
|           | 0-4   | <b>0</b> No adhesion; <b>1</b> Filmy adhesion easily separable with blunt dissection; <b>2</b> Mild to moderate adhesions with the freely dissectible plane; <b>3</b> Moderate to dense adhesion with difficult dissection; <b>4</b> Non-dissectible plane                                                                                                                                                                                                                                     |
|           | 0-4   | <b>0</b> No adhesion; <b>1</b> No resistance to separation, easy to separate; <b>2</b> Moderate force required for separation, blunt dissection; <b>3</b> Sharp dissections required for separation, cannot separate without damaging serosa; <b>4</b> Adhesions in a conglomerate with the intraperitoneal organs, impossible to divide and count                                                                                                                                             |
|           | 1-4   | <b>1</b> No adhesions; <b>2</b> Filmy adhesions, easily broken manually; <b>3</b> Dense adhesion requiring blunt dissection to separate viscera from mesh; <b>4</b> Very dense adhesions, viscera matted to mesh surface, requiring sharp dissection to separate viscera from mesh                                                                                                                                                                                                             |
|           | 1-4   | <b>1</b> Falls away with gentle traction and no bleeding of separation surface, no adhesion; <b>2</b> Falls away with traction and bleeding of separation surface; <b>3</b> Requires blunt                                                                                                                                                                                                                                                                                                     |

|            |     |                                                                                                                                                                                                                                                                                                                                                                                                                               |
|------------|-----|-------------------------------------------------------------------------------------------------------------------------------------------------------------------------------------------------------------------------------------------------------------------------------------------------------------------------------------------------------------------------------------------------------------------------------|
|            |     | dissection; <b>4</b> Requires sharp dissection                                                                                                                                                                                                                                                                                                                                                                                |
|            | 0-3 | <b>0</b> No adhesions; <b>1</b> Light adhesion that can be freed by pulling; <b>2</b> Adhesions that need to be released by blunt dissection; <b>3</b> Firm adhesions only released by sharp instruments                                                                                                                                                                                                                      |
|            | 0-3 | <b>0</b> No adhesions; <b>1</b> Gentle blunt dissection required to free adhesions; <b>2</b> Aggressive blunt dissections required to free adhesions; <b>3</b> Sharp dissections required to free adhesions                                                                                                                                                                                                                   |
|            | 0-3 | <b>0</b> No adhesions; <b>1</b> Adhesion easily freed with gentle tension; <b>2</b> Adhesions able to be freed with blunt dissection; <b>3</b> Adhesions requiring sharp dissection to separate from the implant site                                                                                                                                                                                                         |
|            | 0-3 | <b>0</b> No adhesion; <b>1</b> Loose adhesion needs blunt dissection; <b>2</b> Adhesion needs aggressive blunt dissection; <b>3</b> Dense and thick adhesion needs sharp dissection                                                                                                                                                                                                                                           |
|            | 0-3 | <b>0</b> Without adhesions; <b>1</b> Flimsy adhesions: Easily removed with blunt dissection and results in limited bleeding; <b>2</b> Intermediate adhesions: removed with more aggressive blunt dissection or little sharp dissection, results in moderate bleeding and the good plane of dissection present; <b>3</b> Firm adhesions: Removed only with sharp dissection, bleed heavily and no plane of dissection present. |
|            | 0-3 | <b>0</b> no adhesion; <b>1</b> mild, easily separable intestinal adhesion; <b>2</b> moderate intestinal adhesion, separable by blunt dissection; <b>3</b> severe intestinal adhesion requiring sharp dissection to separate.                                                                                                                                                                                                  |
|            | 0-3 | <b>0 None</b> Absence of adhesions; <b>1 Little</b> Fine adhesion for easy release; <b>2 Moderate</b> Adhesions requiring a blunt dissection to be released; <b>3 Intense</b> Firm adhesions, which require a higher force to release them, producing partial or total injury of the viscera involved.                                                                                                                        |
|            | No  | <b>(a)</b> loose, transparent, and easily dissected; <b>(b)</b> firm, whitish in color, and more difficult to dissect; <b>(c)</b> integrated within the prosthesis/visceral peritoneum interface and difficult to dissect away from the biomaterial and intestinal serosa.                                                                                                                                                    |
| Appearance | 0-3 | <b>0</b> No adhesion; <b>1</b> Filmy and avascular; <b>2</b> Moderately filmy and vascular; <b>3</b> Dense and significantly vascular                                                                                                                                                                                                                                                                                         |
|            | 0-4 | <b>0</b> no adhesions; <b>1</b> filmy; <b>2</b> dense; <b>3</b> capillaries present; <b>4</b> larger vessels                                                                                                                                                                                                                                                                                                                  |
|            | 0-5 | <b>0</b> no adhesions; <b>1</b> thin filmy adhesion; <b>2</b> more than one thin adhesion; <b>3</b> thick adhesions with focal point; <b>4</b> thick adhesions with planar attachment; <b>5</b> very thick vascularized adhesions or more than one planar adhesion                                                                                                                                                            |

---
